# Supplementary material for: Room temperature and solvent-free iridium-catalyzed selective alkylation of anilines with alcohols
Source: Royal Society of Chemistry journal article supplement (doi:10.1039/c3cc42669f), 2013-01-01
Supplement: c3cc42669f.pdf [file c3cc42669f.pdf]

# Supporting information

## Room Temperature and Solvent-Free Iridium-Catalyzed Selective Alkylation of Anilines with Alcohols

Jia-Qi Li <sup>a</sup> and Pher G. Andersson\* <sup>b,c</sup>

<sup>a</sup>Department of Applied Chemistry, China Agricultural University, Beijing 100193, China

<sup>b</sup>Department of Organic Chemistry, Arrhenius Laboratory, Stockholm University, SE-106 91 Stockholm, Sweden

<sup>c</sup>School of Chemistry and Physics, University of KwaZulu-Natal, Durban 4000, South Africa

[phera@organ.su.se](mailto:phera@organ.su.se)

### Table of contents:

|                                                                                               |     |
|-----------------------------------------------------------------------------------------------|-----|
| General methods.....                                                                          | S2  |
| The synthesis of Ir and Rh complexes.....                                                     | S2  |
| <i>Table SI</i> . N-Alkylation of aniline with benzyl alcohol under different conditions..... | S4  |
| General procedure for alkylation of amine with alcohols.....                                  | S4  |
| Diglyme as solvent                                                                            |     |
| Method A (When both aniline derivatives and alcohols are liquids)                             |     |
| Method B (When either aniline derivatives or alcohols are solid)                              |     |
| Solvent free condition                                                                        |     |
| Method A (When both aniline derivatives and alcohols are liquids)                             |     |
| Method B (When either aniline derivatives or alcohols are solid)                              |     |
| Spectra of new compounds.....                                                                 | S9  |
| References.....                                                                               | S12 |

## General methods

All reactions were conducted under dry Argon atmosphere using magnetic stirring.

DCM was freshly distilled from CaH<sub>2</sub> under nitrogen. Diglyme was freshly distilled from LiAlH<sub>4</sub> under reduced pressure. Toluene, DIPE, THF, DME, and dioxane were freshly distilled from sodium-benzophenone under nitrogen.

KOtBu was bought from Sigma-Aldrich as sublimed grade, 99.99% trace metals basis. The 3-(2-aminophenyl)propanol was synthesized according to the literature.<sup>[1]</sup> The 1-Naphthylmethanol and 2-naphthylmethanol were prepared by reduction of the corresponding acid by LiAlH<sub>4</sub>. Dapsone was bought from Sigma-Aldrich and used as received.

Except reagents mentioned above, all commercial reagents (amines and alcohols) were purified by vacuum distillation before using.

Chromatographic separations were performed on Kiesel gel 60 H silica gel (particle size: 0.063-0.100 mm). Thin layer chromatography (TLC) was performed on aluminum plates coated with Kieselgel 60 (0.20 mm, UV254) and visualized under ultraviolet light ( $\nu = 254$  nm), or by staining with ethanolic nihydrin (2,2-dihydroxyindane-1,3-dione) and heating.

<sup>1</sup>H NMR spectra were recorded at 500 MHz in CDCl<sub>3</sub> and referenced internally to the residual CHCl<sub>3</sub> peak (7.26 ppm). <sup>13</sup>C NMR spectra were recorded at 75 MHz in CDCl<sub>3</sub> and referenced to the central peak of CDCl<sub>3</sub> (77.0 ppm). <sup>31</sup>P NMR spectra were recorded at 121 MHz in CDCl<sub>3</sub> and referenced to external H<sub>3</sub>PO<sub>4</sub>. Chemical shifts are reported in ppm ( $\delta$  scale). Coupling constants, *J*, are reported in Hertz.

IR spectra were measured using a Perkin Elmer FT-IR apparatus

High resolution mass spectrometric (HRMS) data were obtained using a Bruker microTOF-Q II instrument operating at ambient temperatures, using a sample concentration of approximately 1 ppm.

## The synthesis of Ir and Rh complexes

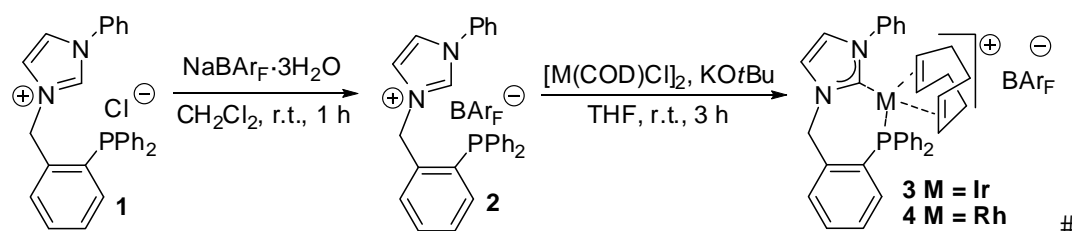

Imidazolium salt **1** (3 mmol) was dissolved in DCM (15 mL). NaBARF·3H<sub>2</sub>O (3.3 mmol) was added in one portion and the solution was stirred at r.t. for 1h. After the reaction was completed by TLC, the solution was dried under vacuum and the residual was purified by flash chromatographic on silica gel with CH<sub>2</sub>Cl<sub>2</sub> as the eluent to afford BARF salt **2** as clear oil.

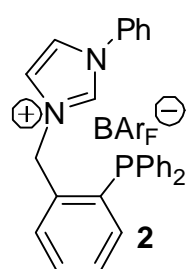

Clear oil, (yield = 83 %), (*R<sub>f</sub>* = 0.40 (tailing), in DCM).

<sup>1</sup>H NMR (CDCl<sub>3</sub>, 500 MHz):  $\delta$  7.97 (s, 1H), 7.73-7.68 (m, 8H), 7.57-7.38 (m, 11H), 7.36-7.04 (m, 12H), 7.01-6.98 (m, 1H), 6.96-6.90 (m, 2H), 5.61 (s, 1H).

<sup>13</sup>C NMR (CDCl<sub>3</sub>, 75 MHz):  $\delta$  161.6 (q, *J* = 49.8), 137.6 (d, *J* = 15.5), 136.0, 134.0-134.5 (br), 134.3, 133.5, 133.3, 133.0, 132.4-132.2 (m), 131.6 (d, *J* = 11.9), 131.3, (d, *J* = 3.8), 130.8, 130.7, 130.0, 129.8, 129.6-129.4 (m), 129.1, 128.8-128.2 (m), 126.3, 122.8, 122.7, 121.7, 121.6, 119.1, 117.7-117.3 (m), 53.7 (d, *J* = 21.6).

$^{31}\text{P}$  NMR ( $\text{CDCl}_3$ , 121 MHz):  $\delta$  -17.6.

IR (neat,  $\text{cm}^{-1}$ ): 1353, 1272, 1112, 886, 681.

HRMS (ESI)  $m/z$  = 419.1820, calcd for  $\text{C}_{28}\text{H}_{24}\text{N}_2\text{P}$  [ $\text{M} - \text{BAR}_F$ ] $^+$  = 419.1672.

$\text{BAR}_F$  salt **2** (3 mmol) was co-evaporated with dry toluene ( $3 \times 20$  mL) and dissolved in dry THF (30 mL) under Ar.  $[\text{M}(\text{COD})\text{Cl}]_2$  ( $\text{M} = \text{Ir}$  or  $\text{Rh}$ ) (1.5 mmol) and  $\text{KO}t\text{Bu}$  (3.15 mmol) were added. The atmosphere in the flask was evacuated and replenished with Ar three times. The mixture was stirred at r.t. for 3h. After the reaction was completed by TLC, the solution was dried under vacuum and the residual was purified by flash chromatographic on silica gel with  $\text{CH}_2\text{Cl}_2$  : pentane (2 : 1) as the eluent to afford iridium complex **3** as red solid or rhodium complex **4** as yellow solid.

CCDC 902840 (iridium complex **3**) and 902841 (rhodium complex **4**) contain the supplementary crystallographic data for this paper. These data can be obtained free of charge from The Cambridge Crystallographic Data Centre via [www.ccdc.cam.ac.uk/data\\_request/cif](http://www.ccdc.cam.ac.uk/data_request/cif)

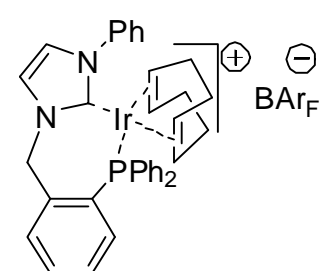

Red solid, (yield = 84%), ( $R_f$  = 0.50 (tailing), in DCM/pentane 3/1).

$^1\text{H}$  NMR ( $\text{CDCl}_3$ , 500 MHz):  $\delta$  7.83-7.71 (m, 8H), 7.59-7.38 (m, 15H), 7.36-7.23 (m, 5H), 7.22-7.15 (m, 3H), 7.09-6.99 (m, 3H), 6.73-6.64 (m, 2H), 4.99-4.87 (m, 1H), 4.82-4.70 (m, 1H), 4.27-4.16 (m, 1H), 3.95-3.84 (m, 1H), 3.49-3.29 (m, 1H), 2.37-1.97 (m, 5H), 1.73-1.34 (m, 3H).

$^{13}\text{C}$  NMR ( $\text{CDCl}_3$ , 75 MHz):  $\delta$  169.2 (q,  $J$  = 10.5), 161.7, 141.0, 140.8, 139.2, 137.7, 134.8 (br), 132.3, 132.2, 132.0, 131.9, 131.8, 131.2-131.0 (m), 130.7, 130.2-129.9 (m), 129.7-129.4 (m), 129.2-129.0 (m), 128.9-128.6 (m), 128.4-128.2 (m), 128.1,

126.3, 124.0, 123.5, 122.7, 120.6, 119.1, 117.9-117.2 (m), 89.3 (d,  $J$  = 10.0), 85.5 (d,  $J$  = 13.3), 79.6, 79.2, 55.5 (d,  $J$  = 7.5), 34.5, 33.9, 33.8, 28.2, 27.9.

$^{31}\text{P}$  NMR ( $\text{CDCl}_3$ , 121 MHz):  $\delta$  6.1.

IR (neat,  $\text{cm}^{-1}$ ): 1353, 1273, 1118, 885, 681.

HRMS (ESI)  $m/z$  = 719.2333, calcd for  $\text{C}_{36}\text{H}_{35}\text{IrN}_2\text{P}$  [ $\text{M} - \text{BAR}_F$ ] $^+$  = 719.2167.

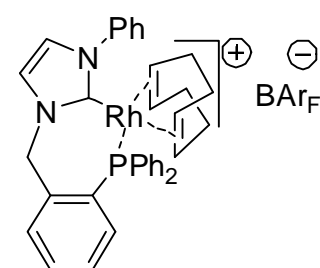

Yellow solid, (yield = 86%), ( $R_f$  = 0.50 (tailing), in DCM/pentane 3/1).

$^1\text{H}$  NMR ( $\text{CDCl}_3$ , 500 MHz):  $\delta$  7.79-7.69 (m, 8H), 7.54-7.27 (m, 18H), 7.27-7.18 (m, 5H), 7.09-7.04 (m, 1H), 7.02-6.95 (m, 2H), 6.81-6.76 (m, 2H), 5.07-4.94 (m, 2H), 4.55-4.45 (m, 1H), 4.41-4.32 (m, 1H), 3.83-3.67 (m, 1H), 2.59-2.28 (m, 5H), 2.18-2.06 (m, 1H), 2.00-1.67 (m, 2H).

$^{13}\text{C}$  NMR ( $\text{CDCl}_3$ , 75 MHz):  $\delta$  173.2 (dd,  $J$  = 50.0 $_{\text{Rh,C}}$ , 15.9 $_{\text{P,C}}$ ), 161.7 (q,  $J$  = 50.5), 141.3, 141.1, 138.7, 137.9, 134.8 (br), 132.3 (d,  $J$  = 2.3), 132.1, 132.0, 131.8, 131.7, 131.6, 131.0, 130.8, 130.7 (d,  $J$  = 2.2), 130.2, 130.0, 129.9, 129.8, 129.6-129.4 (m),

129.2-128.9 (m), 128.8, 128.7-128.6 (m), 128.4-128.2 (m), 124.0, 123.5, 122.7, 120.7, 119.1, 117.6-117.2 (m), 99.3 (m), 96.6 (m), 93.7 (d,  $J$  = 8.7), 92.0 (d,  $J$  = 7.9), 55.8 (d,  $J$  = 10.4), 33.3, 32.9 (d,  $J$  = 3.3), 30.9, 28.0, 27.4.

$^{31}\text{P}$  NMR ( $\text{CDCl}_3$ , 121 MHz):  $\delta$  13.5 (d,  $J$  = 151.7).

IR (neat,  $\text{cm}^{-1}$ ): 1353, 1273, 1117, 886, 681.

HRMS (ESI)  $m/z$  = 629.1772, calcd for  $\text{C}_{36}\text{H}_{35}\text{N}_2\text{PRh}$  [ $\text{M} - \text{BAR}_F$ ] $^+$  = 629.1593.

**Table S1. N-Alkylation of aniline with benzyl alcohol under different conditions<sup>[a]</sup>**

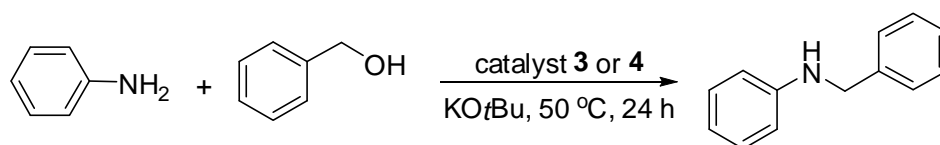

| Entry | Catalyst | Catalyst loading (mol%) | Solvent             | Solvent Volume (mL) | KOtBu (mol%) | Conv <sup>[b]</sup> (%) |
|-------|----------|-------------------------|---------------------|---------------------|--------------|-------------------------|
| 1     | <b>3</b> | 1.0                     | THF                 | 1.0                 | 100          | 77                      |
| 2     | <b>3</b> | 1.0                     | DIPE <sup>[c]</sup> | 1.0                 | 100          | 82                      |
| 3     | <b>3</b> | 1.0                     | dioxane             | 1.0                 | 100          | 34                      |
| 4     | <b>3</b> | 1.0                     | toluene             | 1.0                 | 100          | 70                      |
| 5     | <b>4</b> | 1.0                     | toluene             | 1.0                 | 100          | 81                      |
| 6     | <b>3</b> | 1.0                     | DME                 | 1.0                 | 100          | 99                      |
| 7     | <b>4</b> | 1.0                     | DME                 | 1.0                 | 100          | 68                      |
| 8     | <b>3</b> | 1.0                     | diglyme             | 1.0                 | 100          | 99                      |
| 9     | <b>4</b> | 0.5                     | Toluene             | 1.0                 | 100          | 80                      |
| 10    | <b>4</b> | 0.5                     | diglyme             | 1.0                 | 100          | 92                      |
| 11    | <b>3</b> | 0.5                     | DME                 | 1.0                 | 100          | 97                      |
| 12    | <b>3</b> | 0.5                     | diglyme             | 1.0                 | 100          | 99                      |
| 13    | <b>3</b> | 0.5                     | diglyme             | 0.5                 | 100          | 99                      |
| 14    | <b>3</b> | 0.5                     | diglyme             | 0.25                | 100          | 99                      |
| 15    | <b>3</b> | 0.5                     | diglyme             | 0.25                | 50           | 99                      |
| 16    | <b>3</b> | 0.5                     | diglyme             | 0.25                | 40           | 78                      |
| 17    | <b>3</b> | 0.5                     | diglyme             | 0.25                | 0            | 0                       |

[a] Reaction conditions: 0.5 mmol aniline, 0.55 mmol benzyl alcohol, iridium catalyst **3** or rhodium **4**, KOtBu, solvent, 50 °C, 24 h. [b] Conversion was calculated by <sup>1</sup>H NMR spectroscopy, based on unreacted aniline. [c] DIPE = diisopropyl ether.

## **General procedure for alkylation of amine with alcohols**

### *Diglyme as solvent*

#### **Method A (When both aniline derivatives and alcohols are liquids)**

A Microwave vial (5 mL, tapered style) with a magnetic stirring bar was charged with iridium catalyst **3** (0.5–1.5 mol%) and KOtBu (0.25 mmol). Under an argon atmosphere, aniline (0.5 mmol) and benzyl alcohol (0.55 mmol) were dissolved in diglyme (0.25 mL) and the solution was added. Next, the vial was sealed with a speta (PTFE-faced silicone septa) and the mixture was stirred either 24 h at 50 °C or 48 h at room temperature. The reaction mixture was then quenched by addition of saturated aqueous NH<sub>4</sub>Cl solution. The organic phase was extracted three times with 20 mL of chloroform. The combined organic phases were over MgSO<sub>4</sub>. Solvent was evaporated under vacuum and the residue was further purified by column chromatography.

### Method B (When either aniline derivatives or alcohols is solid)

A Microwave vial (5 mL, tapered style) with a magnetic stirring bar was charged with iridium catalyst **3** (0.5-1.5 mol%), KO<sup>t</sup>Bu (0.25 mmol) and the solid reagent. Under an argon atmosphere, the other liquid reagent was dissolved in diglyme (0.25 mL) and the solution was added. Next, the vial was sealed with a speta (PTFE-faced silicone septa) and the mixture was stirred either 24 h at 50 °C or 48 h at room temperature. The reaction mixture was then quenched by addition of saturated aqueous NH<sub>4</sub>Cl solution. The organic phase was extracted three times with 20 mL of chloroform. The combined organic phases were over MgSO<sub>4</sub>. Solvent was evaporated under vacuum and the residue was further purified by column chromatography.

### *Solvent free condition*

#### Method A (When both aniline derivatives and alcohols are liquid)

A Microwave vial (5 mL, tapered style) with a magnetic stirring bar was charged with iridium catalyst **3** (0.5-1.0 mol%) and KO<sup>t</sup>Bu (0.5 mmol). Under an argon atmosphere, aniline (1.0 mmol) was added followed by addition of benzyl alcohol (1.1 mmol). Next, the vial was sealed with a speta (PTFE-faced silicone septa) and the mixture was stirred either 24 h at 50 °C or 48 h at room temperature. The reaction mixture was then quenched by addition of saturated aqueous NH<sub>4</sub>Cl solution. The organic phase was extracted three times with 20 mL of chloroform. The combined organic phases were over MgSO<sub>4</sub>. Solvent was evaporated under vacuum and the residue was further purified by column chromatography.

#### Method B (When either aniline derivatives or alcohols is solid)

A Microwave vial (5 mL, tapered style) with a magnetic stirring bar was charged with iridium catalyst **3** (0.5-1.0 mol%), KO<sup>t</sup>Bu (0.5 mmol) and the solid reagent. Under an argon atmosphere, the other liquid reagent was added. Next, the vial was sealed with a speta (PTFE-faced silicone septa) and the mixture was stirred either 24 h at 50 °C or 48 h at room temperature. The reaction mixture was then quenched by addition of saturated aqueous NH<sub>4</sub>Cl solution. The organic phase was extracted three times with 20 mL of chloroform. The combined organic phases were over MgSO<sub>4</sub>. Solvent was evaporated under vacuum and the residue was further purified by column chromatography.

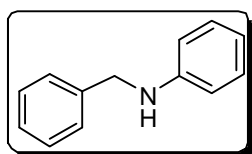

Spectral data match those previously reported.<sup>[2]</sup>

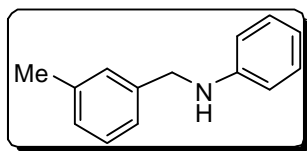

Spectral data match those previously reported.<sup>[3]</sup>

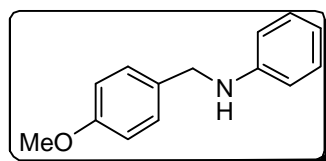

Spectral data match those previously reported.<sup>[4]</sup>

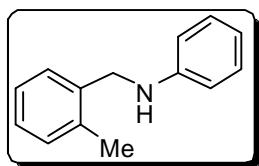

Spectral data match those previously reported.<sup>[5]</sup>

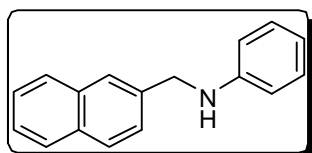

Spectral data match those previously reported.<sup>[6]</sup>

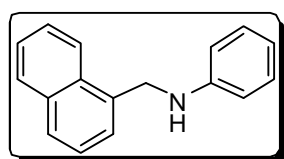

Spectral data match those previously reported.<sup>[7]</sup>

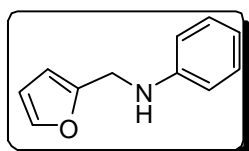

Spectral data match those previously reported.<sup>[6]</sup>

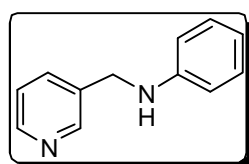

Spectral data match those previously reported.<sup>[8]</sup>

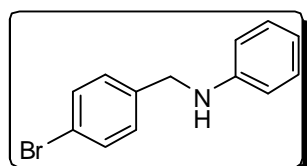

Spectral data match those previously reported.<sup>[7]</sup>

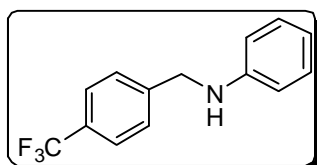

Spectral data match those previously reported.<sup>[3]</sup>

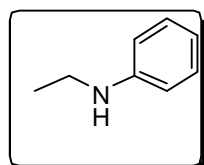

Spectral data match those previously reported.<sup>[9]</sup>

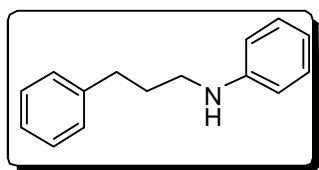

Spectral data match those previously reported.<sup>[10]</sup>

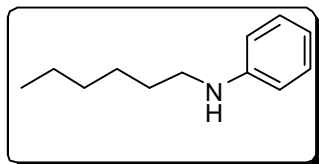

Spectral data match those previously reported.<sup>[6]</sup>

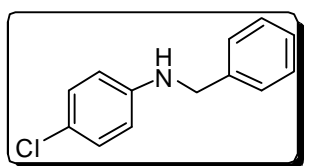

Spectral data match those previously reported.<sup>[4]</sup>

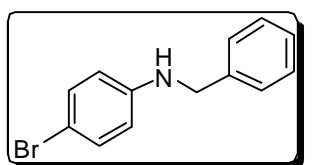

Spectral data match those previously reported.<sup>[4]</sup>

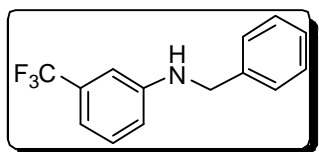

Spectral data match those previously reported.<sup>[11]</sup>

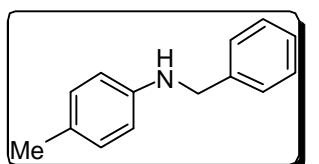

Spectral data match those previously reported.<sup>[12]</sup>

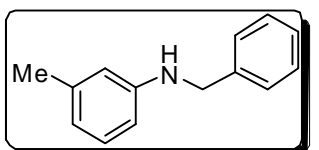

Spectral data match those previously reported.<sup>[2]</sup>

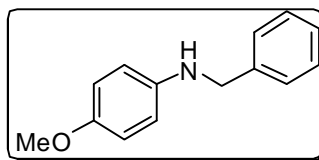

Spectral data match those previously reported.<sup>[2]</sup>

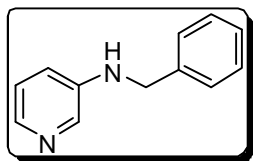

Spectral data match those previously reported.<sup>[2]</sup>

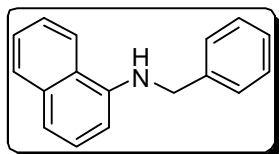

Spectral data match those previously reported.<sup>[5]</sup>

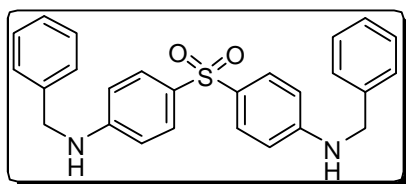

Spectral data match those previously reported.<sup>[13]</sup>

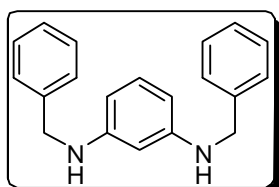

Spectral data match those previously reported.<sup>[13]</sup>

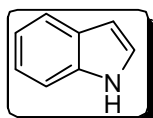

Spectral data match those previously reported.<sup>[14]</sup>

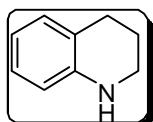

Spectral data match those previously reported.<sup>[14]</sup>



### *Spectra of new compounds*

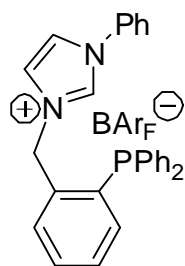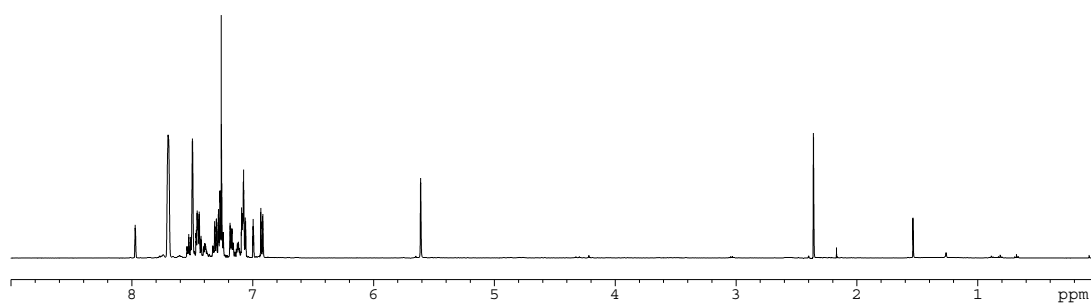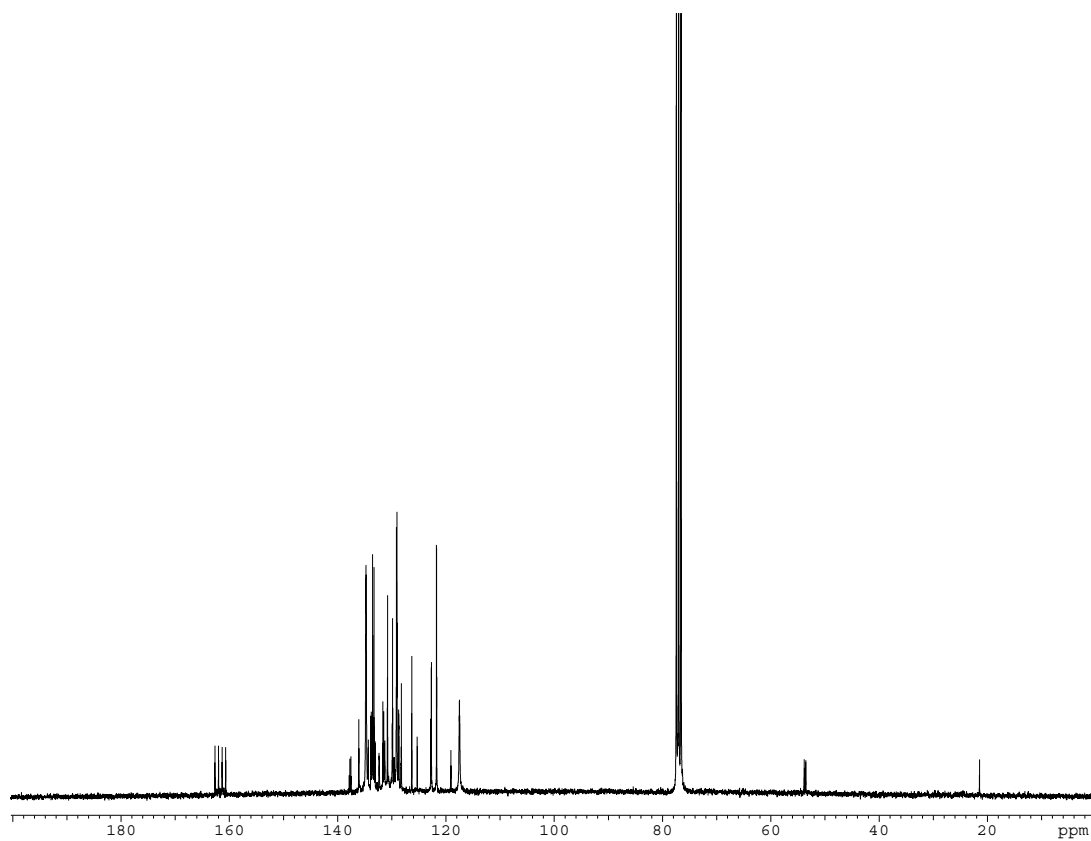

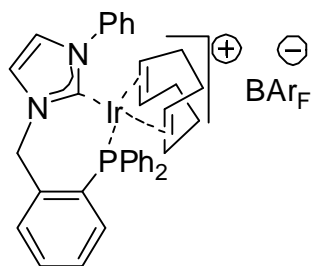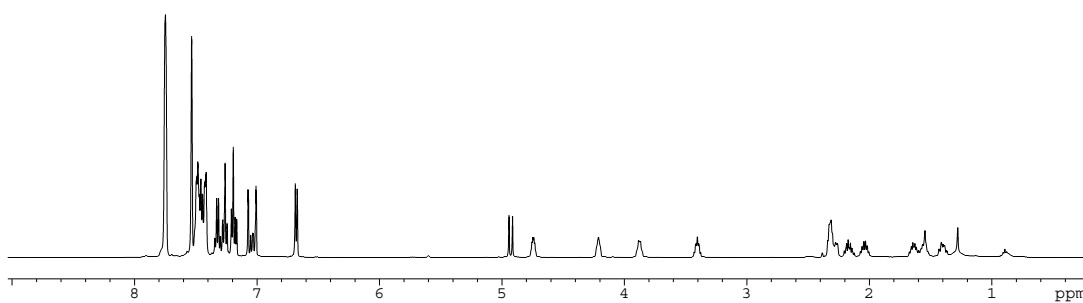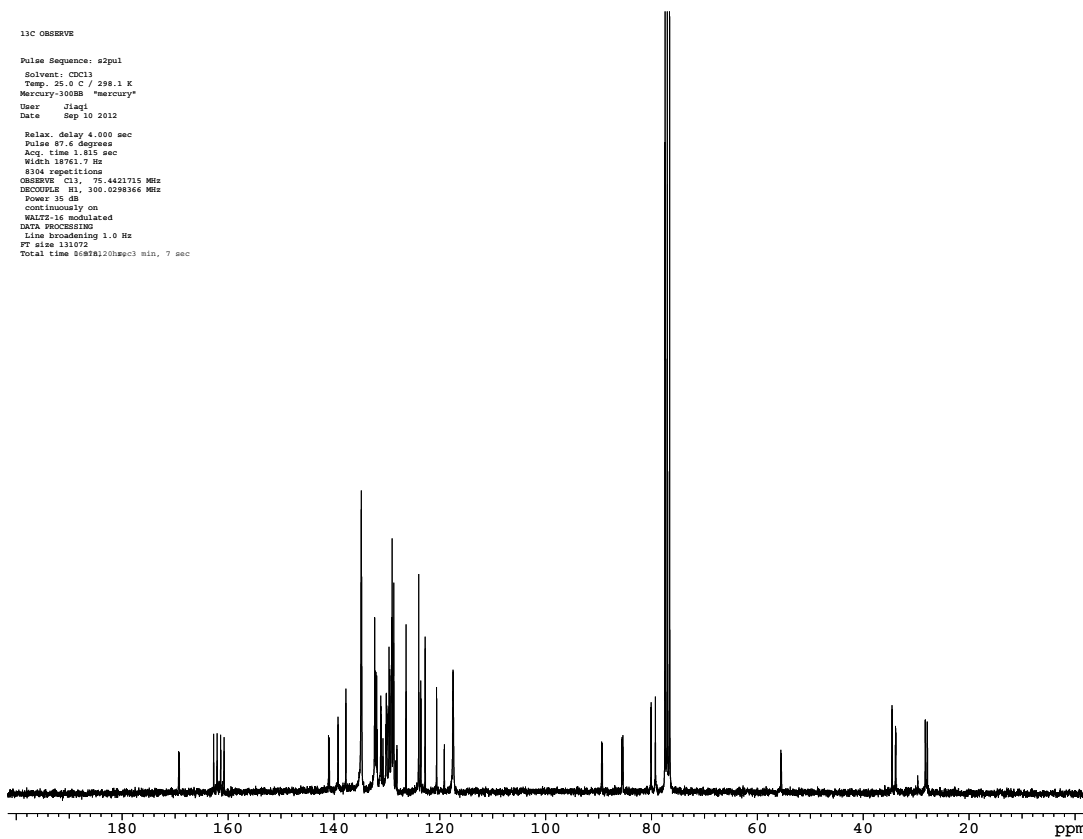

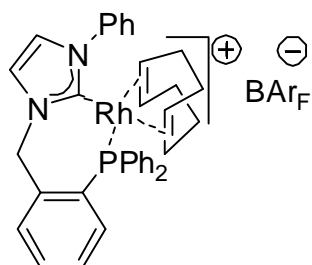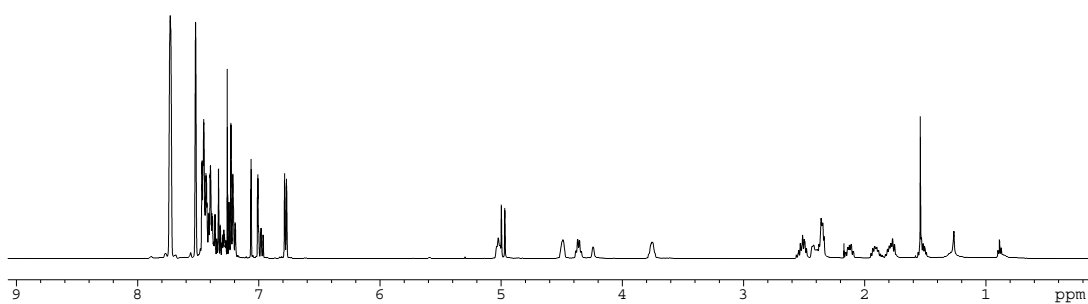

```
1H Observe
Archive directory: /home/vnmr1/vnmrsys/data
Sample directory:
File: 990208

Pulse Sequence: w2pul
Solvent: CDCl3
Temp: 25.0 C / 298.1 K
Mercury-300MR "mercury"
User: cfang
Date: Sep 14 2012

Relax. delay 4.000 sec
Pulse 87.6 degrees
Acq. time 1.815 sec
Widtbl 18761.7 Hz
32480 repetitions
OBSERVE C13, 75.4421707 MHz
DECOUPLE H1, 300.6298366 MHz
Power 35 dB
continuously on
WALTZ16 modulated
DATA PROCESSING
Line broadening 0.2 Hz
PT size 65536
Total time 1697812 hr, 3 min, 7 sec
```

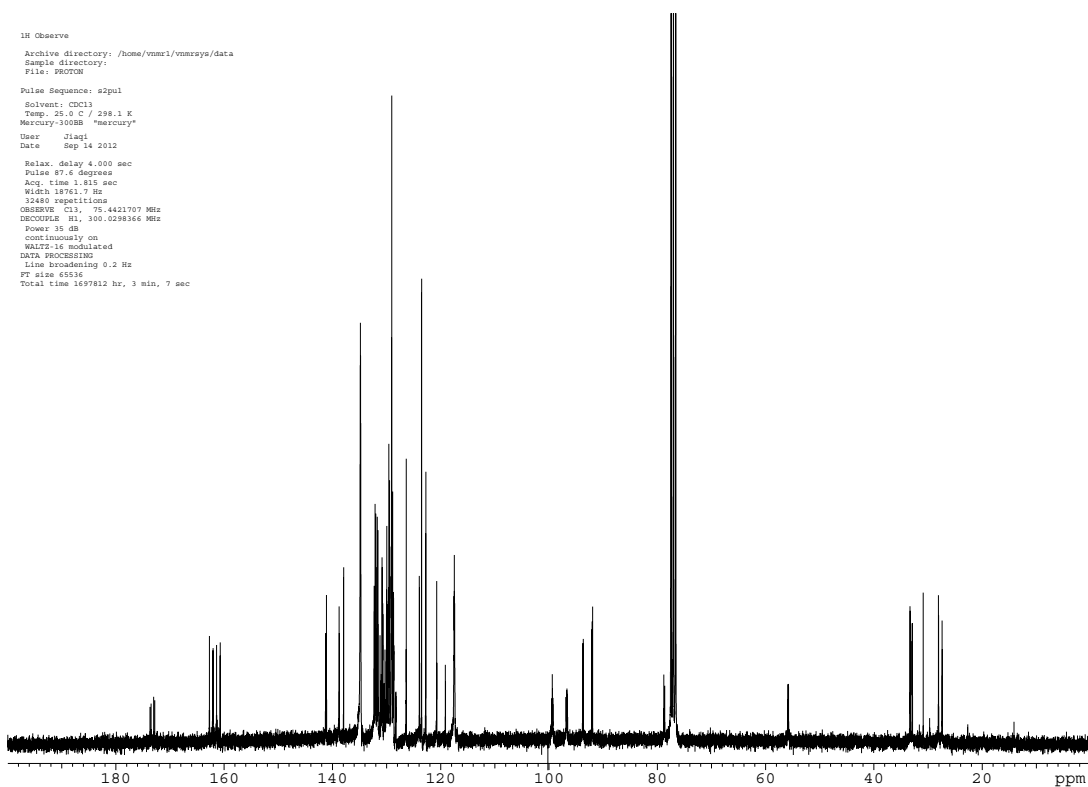

## References

- [1] Masuoka, Y.; Asako, T.; Goto, G.; Noguchi, S. *Chem. Pharm. Bull.* **1986**, *34*, 140-149.
- [2] Blank, B.; Madalska, M.; Kempe, R. *Adv. Synth. Catal.* **2008**, *350*, 749-758.
- [3] Zhao, Y.; Foo, S. W.; Saito, S. *Angew. Chem. Int. Ed.* **2011**, *50*, 3006-3009.
- [4] Bartoszewicz, A.; Marcos, R.; Sahoo, S.; Inge, A. K.; Zou, X.; Martín-Matute, B. *Chem. Eur. J.* **2012**, *18*, 14510-14519.
- [5] Ohta, H.; Yuyama, Y.; Uozumi, Y.; Yamada, Y. M. A. *Org. Lett.* **2011**, *13*, 3892-3895.
- [6] Lee, C.-C.; Liu, S.-T. *Chem. Commun.* **2011**, 6981-6983
- [7] Liu, Y.; Chen, W.; Feng, C.; Deng, G. J. *Chem. Asian. J.* **2011**, *6*, 1142-1146.
- [8] Zhang, Y.; Qi, X.; Cui, X.; Shi, F.; Deng, Y. *Tetrahedron Lett.* **2011**, *52*, 1334-1338.
- [9] Xiang, S.-H.; Xu, J.; Yuang, H.-Q.; Huang, P.-Q. *Synlett.* **2010**, 1829-1832.
- [10] Byun, E.; Hong, B.; Castro, K. A. D.; Lim, M.; Rhee, H. *J. Org. Chem.* **2007**, *72*, 9815-9817.
- [11] Xu, L.; Zhu, D.; Wu, F.; Wang, R.; Wan, B. *Tetrahedron Lett.* **2011**, *52*, 5004-5007.
- [12] Yu, X.; Liu, C.; Jian, L.; Xu, Q. *Org. Lett.* **2011**, *13*, 6184-6187.
- [13] Michlik, S.; Hille, T.; Kempe, R. *Adv. Synth. Catal.* **2012**, *354*, 847-862.
- [14] <sup>1</sup>H NMR was available on the Sigma-Aldrich Library.
